# Supplementary material for: Experiences and Lessons from a Multicountry NIDIAG Study on Persistent Digestive Disorders in the Tropics
Source: PubMed Central journal article supplement (PMC5094778; doi:10.1371/journal.pntd.0004818), 2016-11-03
Supplement: pntd.0004818.s004.pdf [file pntd.0004818.s004.pdf]

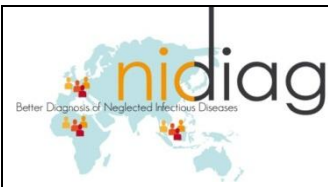

**SOP Title:** Specific treatment procedures (including dosage)

**Study title:** Diagnosis of neglected tropical diseases (NTDs) in patients presenting with persistent digestive disorders ( $\geq 2$  weeks) in Côte d'Ivoire, Indonesia, Mali and Nepal.

## 1. Scope and application

This procedure provides a guideline on the treatment of specific diagnosed pathogens in the work-up of patients and controls. General recommendations are summarized and pathogen-specific guidelines are displayed.

## 2. Responsibilities

| Function        | Activities                                                                                                                                                                                                                             |
|-----------------|----------------------------------------------------------------------------------------------------------------------------------------------------------------------------------------------------------------------------------------|
| Study physician | <ul style="list-style-type: none"> <li>• Provide adequate treatment to infected patients</li> <li>• Adapt your treatment plan to the individual characteristics of the patient, if need be (e.g. in case of pregnant women)</li> </ul> |

## 3. General considerations

- NIDIAG is a non-interventional study. Hence, the type of prescribed treatment (e.g. empiric medication in case of persistent diarrhoea) is not influenced by the study team, although it should be limited to antibiotics (ofloxacin, erythromycin, etc.) or antiparasitic agents (metronidazole) depending on the treatment history. All prescribed medication needs to be well documented in the “Medication Form” of the CRF.
- When a certain pathogen is diagnosed in a symptomatic patient, specific treatment will be offered free of charge to the patient. The choice of the specific medication will be guided by national guidelines, common clinical experience and existing evidence on the most effective essential drugs that are available in the study countries.
- Symptomatic patients and asymptomatic controls should be treated when diagnosed with a helminth infection (e.g. *Strongyloides stercoralis*) to avoid later complications arising from such an infection. In case of intestinal protozoa infection (e.g. *Giardia intestinalis*) asymptomatic carriage rates are high and treatment should only be initiated in case of a clear clinical symptomatology that might be caused by this pathogen. Likewise, bacterial enteric pathogens should not be treated if found in healthy individuals.

## 4. Treatment recommendations

### Bacteria

#### *Campylobacter* spp.

Macrolides  
(e.g. erythromycin 4x500 mg/day for 3-5 days in adults and 12.5 mg/kg 4x per day for 3-5 days in children, Or azithromycin 500mg/day for 3 days in adults or 10 mg/kg/day for 3 days in children)

#### *Salmonella* spp

Fluoroquinolones (e.g. ofloxacin 2x400 mg/day for 3-5 days or ciprofloxacin 2x500 mg/day for 3-5 days) or azithromycin 10 mg/kg/day for 3 days (children and pregnant women)

#### *Shigella* spp.

Fluoroquinolones (e.g. ofloxacin 2x400 mg/day for 3-5 days or ciprofloxacin 2x500 mg/day for 3-5 days) or azithromycin 10 mg/kg/day for 3 days (children and pregnant women)

### Intestinal protozoa

|                                |                                                                                                                                  |
|--------------------------------|----------------------------------------------------------------------------------------------------------------------------------|
| <i>Cryptosporidium parvum</i>  | No recommendation for any specific antiparasitic treatment                                                                       |
| <i>Cyclospora cayetanensis</i> | Cotrimoxazole forte 160/800 2x1 tab daily for 7 days<br>(5 mg TMP + 25 mg SMZ/kg/day for 7 days in children)                     |
| <i>Cystoisospora belli</i>     | Cotrimoxazole forte 160/800 2x1 tab daily for 7 days<br>(5 mg TMP + 25 mg SMZ/kg/day for 7 days in children)                     |
| <i>Entamoeba histolytica</i>   | Metronidazole 500-750 mg (10-15 mg/kg) thrice a day for 7 days<br>followed by paromomycin (10 mg/kg/8h for 7 days, if available) |
| <i>Giardia intestinalis</i>    | Metronidazole (e.g. 250-500mg thrice a day for 5 days; pediatric<br>dose: 5mg/kg 3x/day for 5 days)                              |

## Helminths

|                                  |                                                                             |
|----------------------------------|-----------------------------------------------------------------------------|
| <i>Ascaris lumbricoides</i>      | Albendazole (400 mg) or mebendazole (500 mg) as single dose                 |
| <i>Trichuris trichiura</i>       | Albendazole (400 mg) or mebendazole (500 mg) over three<br>consecutive days |
| Hookworm                         | Albendazole (400 mg) as single dose                                         |
| <i>Strongyloides stercoralis</i> | Ivermectin (200 µg/kg) as single dose                                       |
| <i>Schistosoma mansoni</i>       | Praziquantel (40 mg/kg) as single dose                                      |

## 5. Records and archives

### Appendices & Forms for completion

| Number | Title |
|--------|-------|
| NA     | NA    |

## 6. Document History

### Revision

|                                |                                 |
|--------------------------------|---------------------------------|
| SOP WP2-CLIN-14-V1.0-02Dec2013 | Initial version by Sören Becker |
| SOP WP2-CLIN-14-V2.0-09Dec2013 | Revision by Emmanuel Bottieau   |
| SOP WP2-CLIN-14-V3.0-23Feb2014 | Revision by Sören Becker        |
| SOP WP2-CLIN-14-V4.0-28Feb2014 | Approval by François Chappuis   |

| Name and function                    | Date                     | Signature                                                                             |
|--------------------------------------|--------------------------|---------------------------------------------------------------------------------------|
| <i>Author</i>                        |                          |                                                                                       |
| Sören L. Becker                      | 02.12.2013               |  |
| <i>Reviewed by</i>                   |                          |                                                                                       |
| Emmanuel Bottieau<br>Sören L. Becker | 09.12.2013<br>23.02.2014 |  |
| <i>Approved by</i>                   |                          |                                                                                       |

|                   |            |                                                                                     |
|-------------------|------------|-------------------------------------------------------------------------------------|
| François Chappuis | 28.02.2014 |  |
|-------------------|------------|-------------------------------------------------------------------------------------|
