# Supplementary material for: Experiences and Lessons from a Multicountry NIDIAG Study on Persistent Digestive Disorders in the Tropics
Source: PubMed Central journal article supplement (PMC5094778; doi:10.1371/journal.pntd.0004818), 2016-11-03
Supplement: pntd.0004818.s006.pdf [file pntd.0004818.s006.pdf]

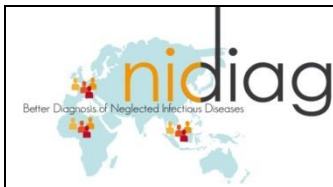

**SOP title:** Patient recruitment and patient flow

**Study title:** Diagnosis of neglected tropical diseases (NTDs) in patients presenting with persistent digestive disorders ( $\geq 2$  weeks) in Côte d'Ivoire, Indonesia, Mali and Nepal.

## 1. Scope and application

This SOP describes how patients are recruited in the NIDIAG study on persistent digestive disorders. Additionally, the patient flow and patient work-up are described in a flow chart.

## 2. Responsibilities

| Function                            | Activities                                                                                                                                                                                                                                                                                                                                                                                                                                                                          |
|-------------------------------------|-------------------------------------------------------------------------------------------------------------------------------------------------------------------------------------------------------------------------------------------------------------------------------------------------------------------------------------------------------------------------------------------------------------------------------------------------------------------------------------|
| Study physician                     | <ul style="list-style-type: none"> <li>• Obtain the informed consent from eligible patients.</li> <li>• Perform clinical history taking and physical examination.</li> <li>• Provide clinical diagnosis.</li> </ul>                                                                                                                                                                                                                                                                 |
| Laboratory technician               | <ul style="list-style-type: none"> <li>• Document incoming samples in the "Study Specimen Log".</li> <li>• Perform laboratory tests on stool and urine samples.</li> <li>• Document the results of laboratory tests in the lab result form.</li> </ul>                                                                                                                                                                                                                              |
| Study site investigator/Study nurse | <ul style="list-style-type: none"> <li>• Check eligible patients for potential inclusion in the study.</li> <li>• Document eligible patients in the "Patient Identification List".</li> <li>• Help with CRF filling/Transcribe results from lab result form to the CRF.</li> <li>• Check all study documents for completeness, accuracy and consistency.</li> <li>• Provide sampling containers to study participants and explain how to obtain stool and urine samples.</li> </ul> |

## 3. Procedures

- Patients are recruited in the respective study centers in each study country (Côte d'Ivoire, Indonesia, Mali and Nepal). If the amount of patients recruited in the hospital setting is too low, the study team may decide to collaborate with Peripheral Health Centers (PHCs) in the surroundings of the study center to increase the number of patients with persistent digestive disorders.
- For the recruitment of asymptomatic controls, please refer to the respective SOP (SOP-WP2-CLIN-13).
- Once an eligible patient presents to one of the study centers, follow this study flowchart for patient work-up:

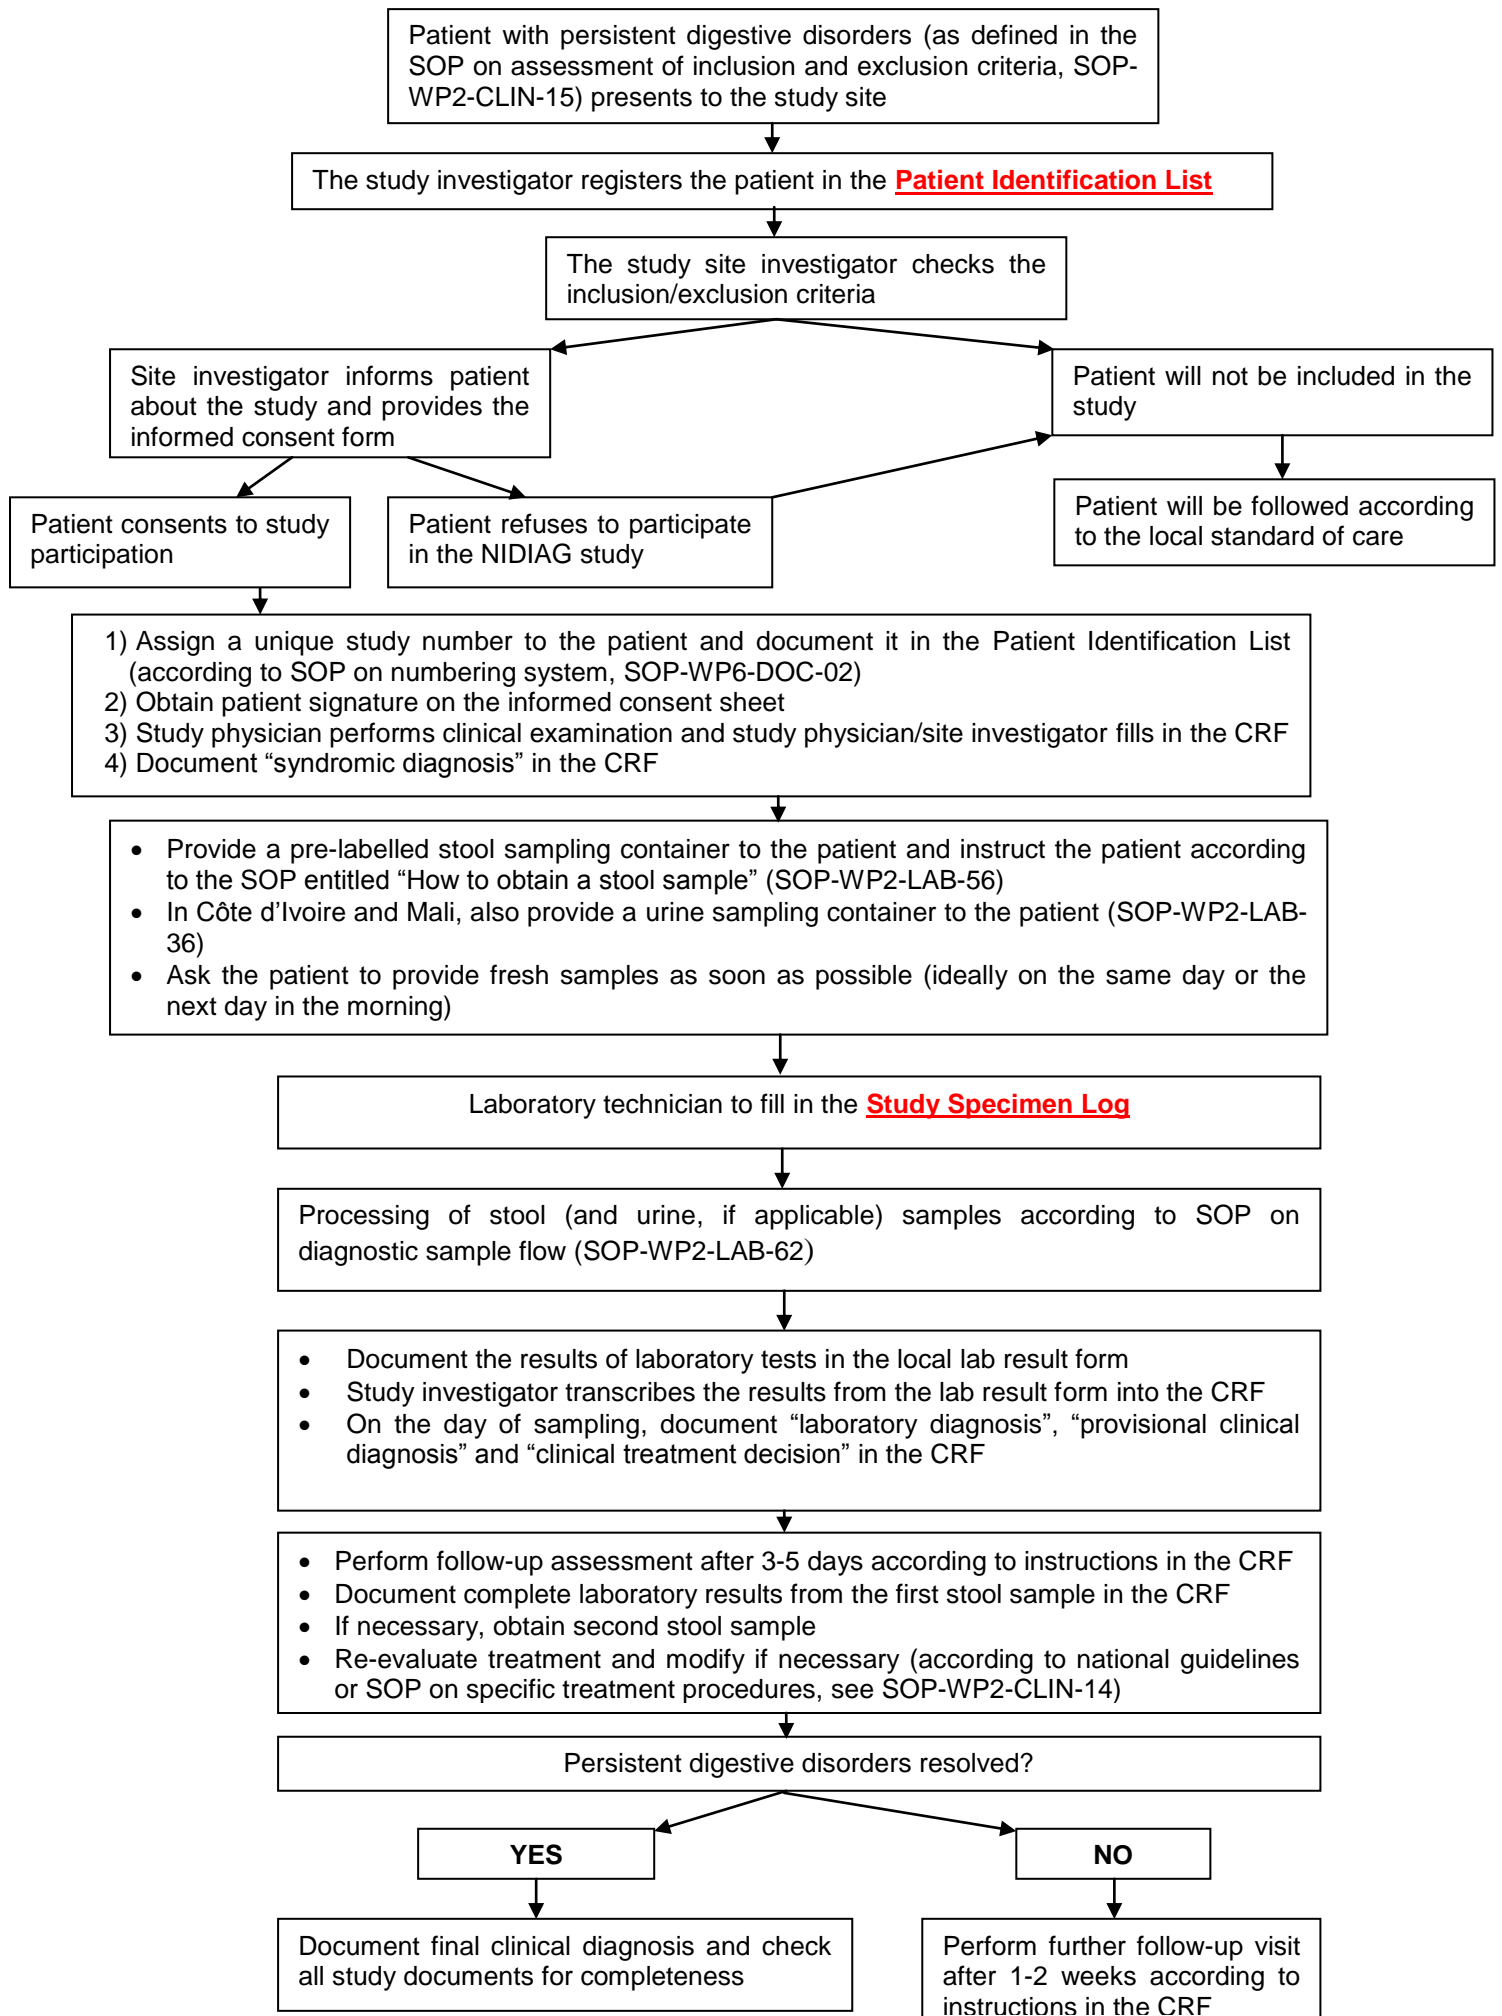

## 4. Records and archives

| Appendices & Forms for completion |                                                         |
|-----------------------------------|---------------------------------------------------------|
| Number                            | Title                                                   |
|                                   | Case Report Form (CRF)                                  |
|                                   | Patient Identification List                             |
|                                   | Study Specimens Log                                     |
|                                   | Informed Consent Form                                   |
|                                   | Laboratory Result Form                                  |
| SOP-WP2-LAB-56                    | SOP "How to obtain a stool sample"                      |
| SOP-WP2-LAB-36                    | SOP "How to obtain a urine sample"                      |
| SOP-WP2-LAB-62                    | SOP "Diagnostic sample flow"                            |
| SOP-WP2-CLIN-15                   | SOP "Assessment of inclusion and exclusion criteria"    |
| SOP-WP2-CLIN-13                   | SOP "Selection of asymptomatic controls"                |
| SOP-WP6-DOC-02                    | SOP "Numbering system to be used in NIDIAG WP2 studies" |

## 5. Document history

| Version                        |                                                |
|--------------------------------|------------------------------------------------|
| SOP-WP2-CLIN-16-V1.0-9Jun2014  | Initial version by Soeren Becker               |
| SOP-WP2-CLIN-16-V1.0-10Jun2014 | Revision by Peiling Yap and Harry van Loen     |
| SOP-WP2-CLIN-16-V1.0-13Jun2014 | Approval by Saye Renion and Silué D. Kigbafori |

| Name and function             | Date       | Signature                                                                             |
|-------------------------------|------------|---------------------------------------------------------------------------------------|
| <i>Author</i>                 |            |                                                                                       |
| Sören Becker                  | 09.06.2014 |  |
| <i>Revision</i>               |            |                                                                                       |
| Peiling Yap<br>Harry van Loen | 10.06.2014 |  |
| <i>Approval</i>               |            |                                                                                       |
| Joel Azragon                  | 13.06.2014 |  |
