# Supplementary material for: Experiences and Lessons from a Multicountry NIDIAG Study on Persistent Digestive Disorders in the Tropics
Source: PubMed Central journal article supplement (PMC5094778; doi:10.1371/journal.pntd.0004818), 2016-11-03
Supplement: pntd.0004818.s020.pdf [file pntd.0004818.s020.pdf]

|                                                                                   |                                                                                                                                                                                                                                                                                        |
|-----------------------------------------------------------------------------------|----------------------------------------------------------------------------------------------------------------------------------------------------------------------------------------------------------------------------------------------------------------------------------------|
|  | <p><b>SOP title : Obtaining a midstream sample of urine (Digestive syndrome)</b></p> <p>Study: Diagnosis of neglected tropical diseases (NTDs) in patients presenting with persistent digestive disorders (<math>\geq 2</math> weeks) in Côte d'Ivoire, Indonesia, Mali and Nepal.</p> |
|-----------------------------------------------------------------------------------|----------------------------------------------------------------------------------------------------------------------------------------------------------------------------------------------------------------------------------------------------------------------------------------|

## 1. Scope and application

*This document contains instructions on how to obtain a midstream sample of urine*

## 2. Responsibilities

| Function              | Activities                                                                                                |
|-----------------------|-----------------------------------------------------------------------------------------------------------|
| Laboratory technician | <ul style="list-style-type: none"> <li>• Obtain urine samples</li> <li>• Follow the procedures</li> </ul> |

## 3. Procedures

### 3.1 Precautions

- All urine samples are potentially infectious. Respect the universal precautions. USE SINGLE-USE GLOVES DURING THE ENTIRE PROCEDURE!

### 3.2 Required material

- Single-use, plastic receptacle for urine
- Single-use, non-sterile gloves
- Marker

### 3.3 Procedure

- Put on single-use gloves
- Write the patient number, the date and the hour on the receptacle
- Give the receptacle to the patient
- Explain to the patient how to obtain a midstream urine specimen
- Ask the patient to produce a urine sample in a local rest room:
  - Minimum 50 ml
  - Midstream
- Close the cap of the sampling container tightly to avoid any contamination.
- Use the urine within 4 hours after obtaining the sample.

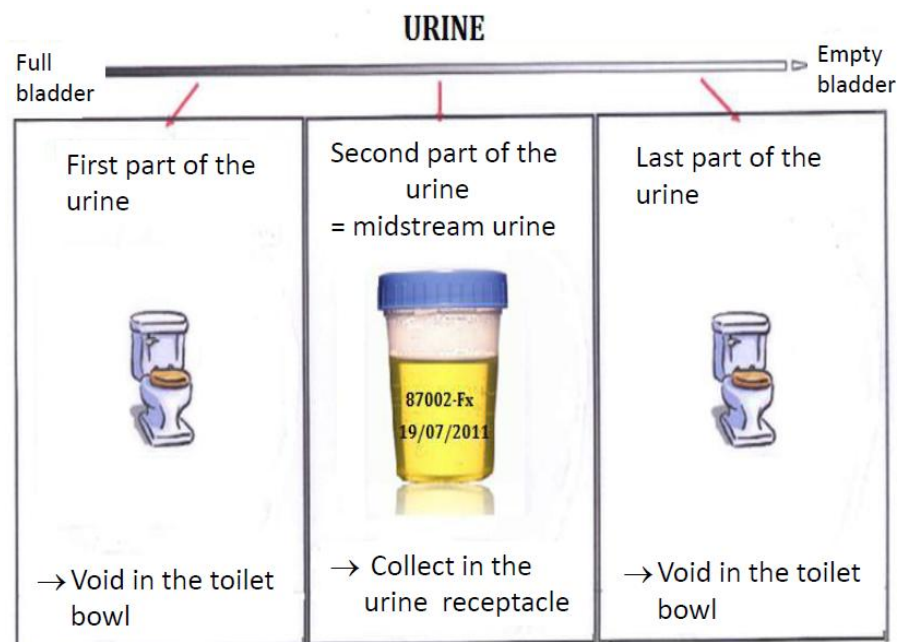

#### 4. Records and archives

| Appendices & forms to complete |                |
|--------------------------------|----------------|
| Number                         | Title          |
| NA                             | Not applicable |

#### 5. Document history

| Revision                        |                                                                      |
|---------------------------------|----------------------------------------------------------------------|
| SOP-WP2-LAB-36-V1.1-13Aug2012   | Initial version                                                      |
| SOP-WP2-LAB-64-V1-16Jul2014_DIG | Initial version modified by Jean T. Coulibaly for digestive syndrome |

| Name and function  | Date       | Signature                                                                            |
|--------------------|------------|--------------------------------------------------------------------------------------|
| <i>Author</i>      |            |                                                                                      |
| Tine Verdonck      | 19/07/2012 |   |
| <i>Reviewed by</i> |            |                                                                                      |
| Jean T. Coulibaly  | 16/07/2014 |   |
| <i>Approved by</i> |            |                                                                                      |
| Ninon Horié        | 04/08/2014 |  |
