# Supplementary material for: Experiences and Lessons from a Multicountry NIDIAG Study on Persistent Digestive Disorders in the Tropics
Source: PubMed Central journal article supplement (PMC5094778; doi:10.1371/journal.pntd.0004818), 2016-11-03
Supplement: pntd.0004818.s029.pdf [file pntd.0004818.s029.pdf]

|                                                                                  |                                                                     |
|----------------------------------------------------------------------------------|---------------------------------------------------------------------|
|  | <b>SOP Title: Stock management</b>                                  |
|                                                                                  | Project/Study: This SOP applies to all NIDIAG WP2 clinical studies. |

## 1. Scope and application

This SOP describes the stock management of consumables and materials that are used for NIDIAG, by using stock cards and performing monthly inventories.

## 2. Responsibilities

| Function                                      | Activities                                                                                                                                                                                                                                                     |
|-----------------------------------------------|----------------------------------------------------------------------------------------------------------------------------------------------------------------------------------------------------------------------------------------------------------------|
| Laboratory technician /<br>Laboratory manager | <ul style="list-style-type: none"> <li>- Stock tracking of consumables and materials.</li> <li>- Management of machines.</li> <li>- Recording of entries and exits of stock on the stock cards.</li> <li>- Monthly physical inventory of all stock.</li> </ul> |

## 3. Procedures

### 3.1 Materials

- Stock card (cf. SOP-WP6-QUAL-07-V1.1-04Feb2013-annex1)
- Monthly inventory form (manual recording on print-out of document or computer file (cf. SOP-WP6-QUAL-07-V1.1-04Feb2013-annex2)

### 3.2 Procedure

#### 3.2.1 Stock cards

1. Record all the entries (“IN”) of the consumables or materials on the stock cards. **Use 1 stock card per product and per expiry date.**
2. Record all exits (“OUT”) of consumables or materials from the stock to the laboratory on the stock cards.

Comment:

- Record each time a box is removed from the stock and sent to the laboratory.
- Record the number of tests, not the number of boxes that are removed.

E.g. malaria RDTs: packaging is 25 tests per box. The exit of 2 boxes of malaria RDTs is recorded as an exit of 50 tests (units).

#### 3.2.2 Monthly inventory

1. Do a physical count of all reagents and consumables at the end of each month and fill out the inventory form, sheet “consumables” of SOP-WP6-QUAL-07-V1.1-04Feb2013-annex2:
  - o Record the stock that was present at the beginning of the month (= physical count at the end of last month)
  - o Record the stock received during the month (= products delivered during that month)
  - o Record the stock still present at the end of the month (= physical count at the end of this month)

Comment: the stock is recorded per test (not per box), per bottle (not per kit), etc.

2. Calculate the consumption of the consumables of each month by using the following formula:

Consumption of this month =

(Initial stock at beginning of the month + Stock received during the month) – Final stock at the end of the month

3. Do a physical count of the materials at least once every 3 months and record the information on the sheet “materials” of the same document (SOP-WP6-QUAL-07-V1.1-04Feb2013-annex2). Do not calculate consumption for materials: materials are re-usable (e.g. micropipette). Record when a material breaks down or is out of use under “comments”.
4. Record the machines in use for the NIDIAG on the sheet “machines” of the document (SOP-WP6-QUAL-07-V1.1-04Feb2013-annex2). Record if the machine functions properly, or – if not – what are the problems and which actions have been taken. Regular maintenance activities can be recorded under “comments”. Fill out the form every month.

#### 4. Records and archives

| Appendices and forms to complete      |                                    |
|---------------------------------------|------------------------------------|
| Number                                | Title                              |
| SOP-WP6-QUAL-07-V1.1-04Feb2013-annex1 | Stock card                         |
| SOP-WP6-QUAL-07-V1.1-04Feb2013-annex2 | Excel document for stock inventory |

#### 5. Documents and history

| Revision                       |                        |
|--------------------------------|------------------------|
| SOP-WP6-QUAL-07-V01-24Sep2012  | Initial version        |
| SOP-WP6-QUAL-07-V1.1-04Feb2013 | Translation in English |

| Name and function | Date       | Signature                                                                             |
|-------------------|------------|---------------------------------------------------------------------------------------|
| Author            |            |                                                                                       |
| Barbara Barbé     | 04/02/2013 |  |
| Reviewed by       |            |                                                                                       |
|                   |            |                                                                                       |
| Approved by       |            |                                                                                       |
| Emilie Alirol     | 07/02/2013 |  |
